# Supplementary material
Source: MDPI journal article supplement (https://www.mdpi.com/2624-781X/4/2/16)

**The first step and the co(II)balamin cofactor inactive particles reactivation in the updated mechanism of the Methionine Synthase process.**

**Tudor Spataru**

**SUPPORTING INFORMATION**

Department of Chemistry, Columbia University, New York, New York 10027, USA  
Natural Sciences Department, Hostos Community College, 500 Grand Concourse, Bronx, New York 10451, USA  
Corresponding author: email: ts2407@columbia.edu

**Table S1. The methylcob(II)alamin, homocysteine ion, and histidine substrates common model CASSCF geometry optimization starting coordinates.**

|    |             |             |             |
|----|-------------|-------------|-------------|
| N  | 0.27519597  | -0.29617784 | 0.94237837  |
| Co | -0.39204881 | -1.22333468 | -0.61651790 |
| N  | -0.93889149 | -1.82879803 | -2.39589541 |
| N  | 1.29448249  | -1.07718780 | -1.52609227 |
| C  | 1.53157297  | 0.33321970  | 0.98659049  |
| C  | -2.49994250 | -1.22402740 | 1.38057652  |
| C  | -1.69687019 | -0.59802106 | 2.31954652  |
| C  | -3.95109152 | -1.60103632 | 1.61550036  |
| H  | -2.10860921 | -0.40180207 | 3.29306977  |
| C  | -0.39861919 | -0.12341603 | 2.05567614  |
| C  | 0.35682716  | 0.76568382  | 3.02605836  |
| C  | 1.59596060  | 1.20637722  | 2.22572135  |
| H  | 2.52190369  | 1.04969150  | 2.76052029  |
| C  | 2.51363927  | 0.20296039  | 0.06814836  |
| C  | 2.39219439  | -0.55409153 | -1.14978183 |
| C  | 3.49888370  | -0.80812784 | -2.15009566 |
| C  | 2.71990880  | -1.33081639 | -3.38231206 |

|   |             |             |             |
|---|-------------|-------------|-------------|
| H | 2.52614785  | -0.51530654 | -4.07384803 |
| C | 1.41953704  | -1.87536848 | -2.76036241 |
| H | 1.56765190  | -2.89834150 | -2.46233519 |
| C | -0.35084683 | -2.91758182 | -4.41147038 |
| C | -1.85662904 | -3.10502036 | -4.09620660 |
| H | -2.15740546 | -4.14488195 | -4.09422039 |
| C | -1.97888862 | -2.49759121 | -2.71397688 |
| C | -3.15433063 | -2.21412090 | -0.54729747 |
| C | -3.10021010 | -2.68319285 | -1.82193195 |
| C | -4.26641825 | -2.52733779 | 0.43596136  |
| H | -4.12187796 | -2.05883589 | 2.57883297  |
| N | -2.17690679 | -1.45688245 | 0.10274109  |
| H | 4.16253896  | -1.56707872 | -1.74965068 |
| C | 0.07506797  | -1.77068801 | -3.47269914 |
| H | 0.18900578  | -3.82559974 | -4.16767562 |
| H | -0.17104210 | -2.69666756 | -5.45564677 |
| H | -2.49346769 | -2.58298608 | -4.80164156 |
| H | -3.91556689 | -3.28013500 | -2.17567343 |
| H | -5.24348311 | -2.35246210 | 0.01527522  |
| H | -4.20178282 | -3.57131349 | 0.72583183  |
| H | -4.55227598 | -0.69953502 | 1.55884791  |
| H | 0.67602527  | 0.21178827  | 3.89649464  |
| H | -0.29184947 | 1.56464913  | 3.33929931  |
| H | 3.44607187  | 0.69959984  | 0.26745424  |
| H | 1.55373905  | 2.25402131  | 1.92637800  |
| H | 3.26394634  | -2.09400730 | -3.91522700 |
| C | -0.05127393 | -3.09199855 | 0.05384107  |
| H | -0.77141552 | -3.15180934 | 0.85609926  |

|   |             |              |             |
|---|-------------|--------------|-------------|
| H | -0.42381487 | -3.78603726  | -0.69903140 |
| H | 4.08806296  | 0.08064975   | -2.34243723 |
| H | -1.37801698 | -10.78438373 | 2.22368466  |
| C | -1.75867785 | -10.02303348 | 2.89300269  |
| H | -1.21623071 | -10.05047079 | 3.83100263  |
| C | -1.67111574 | -8.62778164  | 2.21987964  |
| O | -1.84518183 | -8.62052686  | 0.98917041  |
| O | -1.47076292 | -7.66004120  | 2.97732005  |
| H | -2.80121898 | -10.25870362 | 3.09989314  |
| C | 1.19959089  | -3.73674981  | 0.67756251  |
| O | 1.97462907  | -2.81933176  | 1.46644300  |
| C | 2.26656077  | -4.50973067  | -0.10713391 |
| H | 0.81354645  | -4.48654619  | 1.36730589  |
| C | 3.23862930  | -3.40155086  | 1.76838053  |
| C | 3.27186428  | -4.73679578  | 1.01591551  |
| H | 1.89020770  | -5.42949506  | -0.54073934 |
| H | 3.99954766  | -2.74509854  | 1.36830963  |
| H | 2.92983284  | -5.54211476  | 1.65833138  |
| O | 2.90050060  | -3.72459336  | -1.10847721 |
| H | 3.76799969  | -4.08575343  | -1.22407536 |
| O | 4.55061799  | -5.03671320  | 0.49504216  |
| H | 5.15526535  | -5.11182171  | 1.22388455  |
| N | 3.49887495  | -3.59273984  | 3.16277971  |
| H | 2.88060461  | -4.22362842  | 3.62876939  |
| H | 3.67273661  | -2.76826717  | 3.69181529  |
| C | -1.69001445 | 2.88635248   | -1.41994490 |
| C | -0.38219354 | 1.30151199   | -2.25264949 |
| C | -1.78527462 | 1.71461340   | -0.65781411 |

|   |             |             |             |
|---|-------------|-------------|-------------|
| C | -2.36666156 | 4.08357734  | -1.07206551 |
| H | 0.36549918  | 0.84498871  | -2.85725971 |
| C | -2.60419726 | 1.68880478  | 0.47388345  |
| C | -3.16111266 | 4.03586158  | 0.07526662  |
| H | -2.26439250 | 4.97245588  | -1.65907352 |
| C | -3.28334379 | 2.84849039  | 0.82572481  |
| H | -2.68560180 | 0.81564132  | 1.07282219  |
| N | -0.79179037 | 2.58279178  | -2.44676469 |
| N | -0.94344641 | 0.72761100  | -1.23633371 |
| H | -3.69091543 | 4.90800599  | 0.40425863  |
| H | -3.91244998 | 2.83157771  | 1.69007139  |
| H | 2.07765612  | 4.94109711  | -1.99774718 |
| C | 2.00115338  | 5.26352130  | -0.98862052 |
| N | 1.82599364  | 6.56628070  | -0.60863214 |
| N | 2.10342815  | 4.49286767  | 0.05629388  |
| C | 1.80012061  | 6.60126415  | 0.77579878  |
| H | 1.65969638  | 7.32862892  | -1.21865836 |
| C | 1.99121179  | 5.31221371  | 1.16860742  |
| C | 1.78840357  | 7.86400574  | 1.58946832  |
| H | 2.04191576  | 4.91469834  | 2.15260721  |
| C | 0.52825407  | 8.80017107  | 1.66950396  |
| H | 2.60458887  | 8.50271283  | 1.26795052  |
| H | 2.01467287  | 7.55514998  | 2.60511120  |
| N | 0.61518543  | 9.97887568  | 0.85389919  |
| H | 0.47655109  | 9.13920897  | 2.69080849  |
| C | -0.80735794 | 8.11049739  | 1.46108564  |
| H | 0.63009128  | 10.87727980 | 1.26931540  |
| O | -1.59475609 | 7.88378778  | 2.32915462  |

|   |             |             |             |
|---|-------------|-------------|-------------|
| H | 0.56510738  | 9.93543971  | -0.13628663 |
| O | -1.08031855 | 7.82637470  | 0.17016764  |
| H | -1.90766003 | 7.37051155  | 0.13939085  |
| H | -0.48413319 | 3.19048058  | -3.16614659 |
| H | -0.00747701 | -0.81651519 | -3.98992158 |

**Table S2. The cob(II)alamin bio inactive particle plus AdoMet substrate common model CASSCF geometry optimization starting coordinates.**

|    |             |            |             |
|----|-------------|------------|-------------|
| N  | 0.43263415  | 1.44675684 | -1.64148031 |
| Co | 0.08040848  | 1.87488928 | 0.22889985  |
| N  | -0.47579385 | 2.60961697 | 1.92132829  |
| N  | -1.83334305 | 1.56716477 | 0.01979705  |
| C  | -0.56961803 | 1.31171292 | -2.59800364 |
| C  | 2.96969668  | 2.07001810 | -0.18419602 |
| C  | 2.84690534  | 1.68314561 | -1.52308854 |
| C  | 4.29620593  | 2.47628176 | 0.44060727  |
| H  | 3.74757718  | 1.66479268 | -2.10825645 |
| C  | 1.64509459  | 1.46903414 | -2.20155569 |
| C  | 1.56651071  | 1.25537248 | -3.70345650 |
| C  | 0.05339134  | 1.25687270 | -3.98459409 |
| H  | -0.27098585 | 0.37962700 | -4.53019171 |
| C  | -1.90951388 | 1.29458346 | -2.35677026 |
| C  | -2.51905622 | 1.47711256 | -1.05471164 |
| C  | -4.00955432 | 1.62233203 | -0.79891794 |
| C  | -4.03759225 | 2.19912677 | 0.63961919  |
| H  | -4.13681616 | 3.27514679 | 0.59544135  |
| C  | -2.65706088 | 1.81868325 | 1.21438717  |
| H  | -2.72309797 | 0.89977807 | 1.79191429  |

|   |             |             |             |
|---|-------------|-------------|-------------|
| C | -2.13514606 | 3.03090979  | 3.55305480  |
| C | -0.74076613 | 3.48923444  | 4.06086652  |
| H | -0.49091085 | 3.07664605  | 5.02915928  |
| C | 0.18294716  | 2.98433425  | 2.96784245  |
| C | 2.41586771  | 2.65778321  | 1.92482192  |
| C | 1.63220859  | 2.98305206  | 2.98621125  |
| C | 3.93277282  | 2.74901019  | 1.91124376  |
| H | 5.04329678  | 1.69851980  | 0.32894981  |
| N | 1.96363178  | 2.19870713  | 0.68037801  |
| H | -4.49356312 | 0.65033820  | -0.85695546 |
| C | -1.91763728 | 2.89231404  | 2.03151569  |
| H | -2.39253364 | 2.07159187  | 3.99054469  |
| H | -2.92313067 | 3.72825851  | 3.80106166  |
| H | -0.66953093 | 4.56834697  | 4.14137713  |
| H | 2.11463991  | 3.33320176  | 3.88207658  |
| H | 4.27494994  | 3.71464013  | 2.24630821  |
| H | 4.35813290  | 2.00894734  | 2.57811240  |
| H | 4.68570526  | 3.35676074  | -0.04958973 |
| H | 2.03824789  | 0.31946483  | -3.98315472 |
| H | 2.08479961  | 2.04258555  | -4.23686982 |
| H | -2.57349003 | 1.21732146  | -3.19545428 |
| H | -0.23656710 | 2.11801924  | -4.56926086 |
| H | -4.86228271 | 1.81218760  | 1.22223170  |
| C | -0.64776415 | -4.63035777 | 1.99242649  |
| H | -0.33835791 | -5.54793895 | 2.47283741  |
| H | -4.49347686 | 2.25593130  | -1.52531003 |
| C | -1.08429992 | -4.86188234 | 0.53965979  |
| O | -2.19048146 | -4.01587926 | 0.23695188  |

|   |             |             |             |
|---|-------------|-------------|-------------|
| C | -1.53709731 | -6.31089136 | 0.27830073  |
| H | -0.28495916 | -4.63525107 | -0.15130441 |
| C | -3.33599992 | -4.81152213 | -0.16705590 |
| C | -2.69793863 | -6.09516167 | -0.68053034 |
| H | -0.74199103 | -6.90765248 | -0.14119236 |
| H | -3.93441472 | -5.01500666 | 0.71118783  |
| H | -2.32373305 | -5.92646631 | -1.68666351 |
| O | -2.00406396 | -6.86692118 | 1.49154382  |
| H | -2.55190211 | -7.61318281 | 1.27343072  |
| O | -3.55776381 | -7.20498501 | -0.63778446 |
| H | -4.27247378 | -7.07879211 | -1.24920485 |
| N | -4.12933451 | -4.15572864 | -1.13435910 |
| H | -4.81174403 | -3.50401458 | -0.81962511 |
| C | 0.52752092  | 6.96559929  | -2.03172419 |
| C | -1.36012841 | 6.17278329  | -1.19534420 |
| C | 0.68314137  | 5.66780955  | -1.65731647 |
| H | -2.37286412 | 6.13532812  | -0.87273817 |
| N | -0.78188267 | 7.28330143  | -1.73026673 |
| N | -0.51160274 | 5.18754733  | -1.13826079 |
| H | -1.21987844 | 8.15831136  | -1.88379957 |
| H | -2.07603114 | 3.84716940  | 1.54215956  |
| H | 1.19976495  | 7.66032858  | -2.47326281 |
| H | 1.54848693  | 5.05508209  | -1.72118393 |
| S | 0.72687536  | -3.46412784 | 2.25801050  |
| C | 0.35146009  | -1.97044674 | 1.29657111  |
| H | -0.50249547 | -1.51659576 | 1.76171527  |
| H | 0.12581097  | -2.17486103 | 0.27144312  |
| H | 1.17682948  | -1.28635021 | 1.36648495  |

|   |             |             |             |
|---|-------------|-------------|-------------|
| C | 2.15367058  | -4.27956194 | 1.47582937  |
| H | 2.96987727  | -4.11824596 | 2.16213787  |
| H | 1.89916278  | -5.32701538 | 1.48192973  |
| C | 2.50764465  | -3.84196940 | 0.04634805  |
| H | 2.95781467  | -2.85284822 | 0.03692394  |
| H | 1.61507027  | -3.78272377 | -0.55338387 |
| C | 3.39859445  | -4.85260269 | -0.66222081 |
| H | 3.49476183  | -4.58426590 | -1.70484816 |
| C | 2.88582223  | -6.34637534 | -0.60913269 |
| N | 4.81561418  | -4.92916352 | -0.11314279 |
| H | 4.84725157  | -4.79042066 | 0.87710553  |
| H | 5.03417708  | -5.92297110 | -0.30489493 |
| O | 3.82118641  | -7.15199214 | -0.57627872 |
| O | 1.66709527  | -6.46246730 | -0.60500881 |
| H | -3.68407789 | -3.89585816 | -1.98688164 |
| H | 5.46252701  | -4.30366279 | -0.54304639 |
| H | -1.47024582 | -4.22114024 | 2.55356763  |

**Figure S1. The active space orbitals surfaces, energy, and their electronic density population at the beginning of the CASSCF geometry optimization of the homocysteine negative ion methylcob(II)alamin cofactor and histidine common model: a) The Co-C bond distance is equal to 2.08 Å; b) The Co-N bond distance is equal to 2.35 Å.**



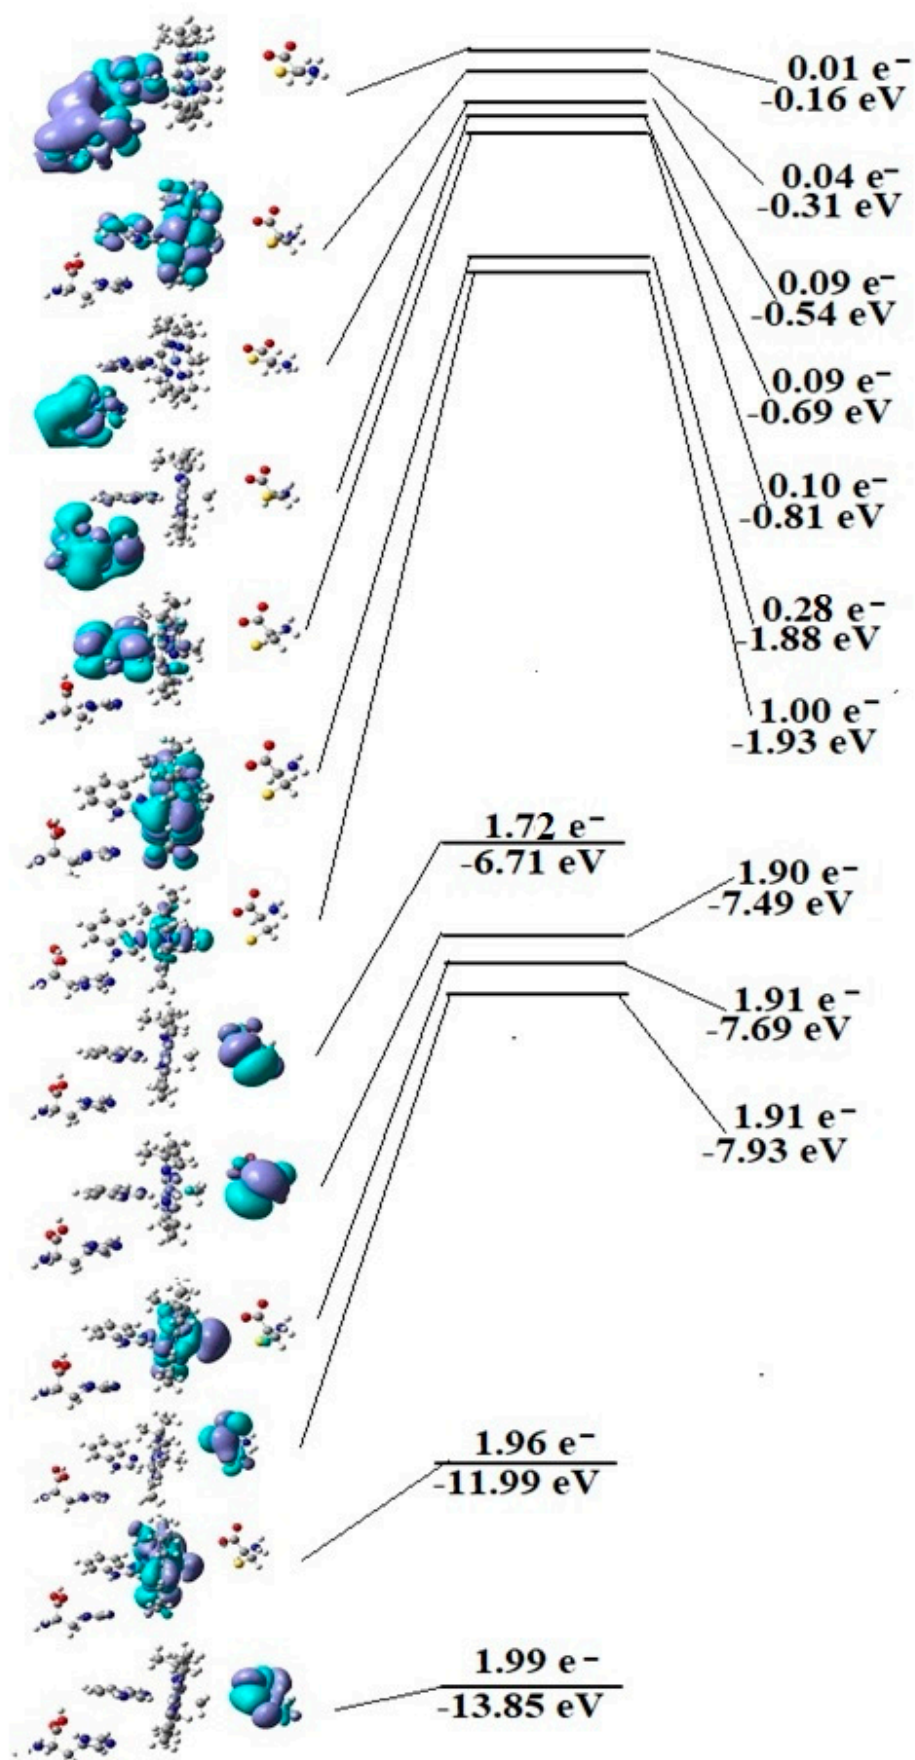

**Figure S2. The active space orbitals surfaces, energy, and their electronic density population at the beginning of the CASSCF geometry optimization of the inactive particle of the cob(II)alamin cofactor and Adomet substrate common model. The Co-N bond distance is equal to 4.00 Å.**

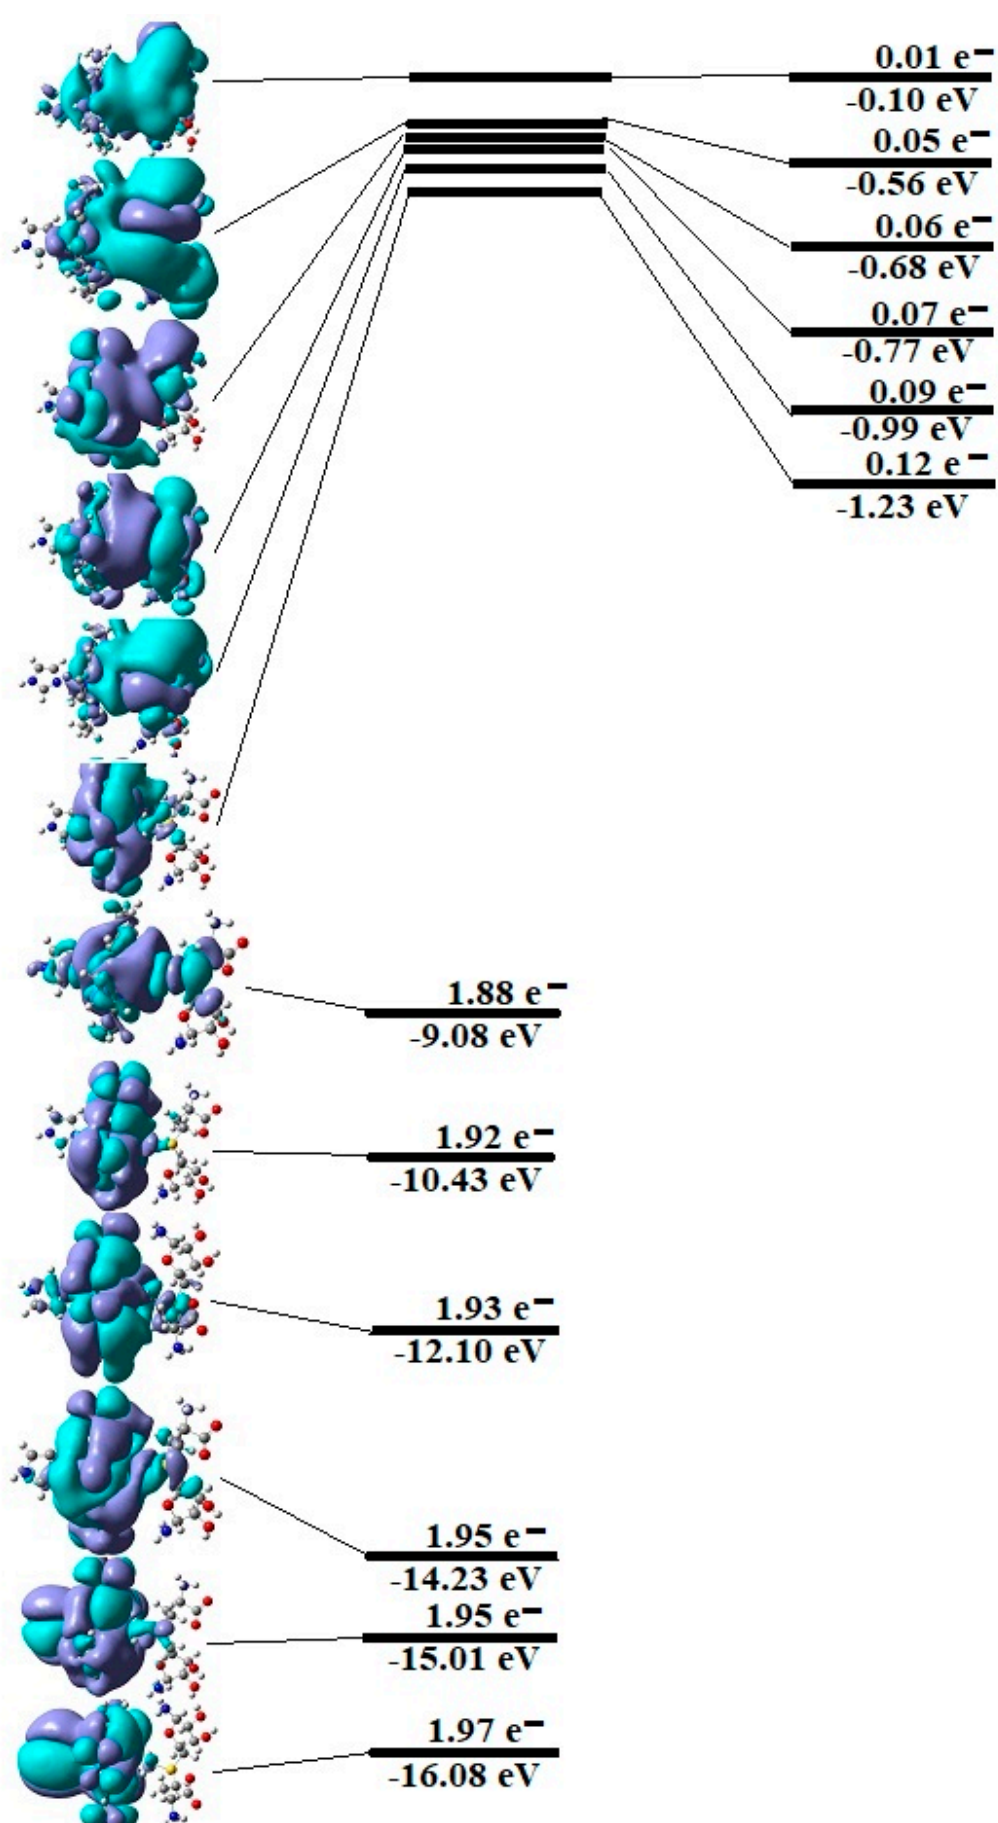

Supplement: s1 [file s1]
